# Supplementary material for: Similar importance of inter-tree and intra-tree variations in wood density observations in Central Europe
Source: Copernicus journal article supplement (doi:10.5194/egusphere-2023-2691), 2023-12-18
Supplement: Supplementary file [file egusphere-2023-2691-AC4-supplement.pdf]

# Similar importance of inter-tree and intra-tree variations in wood density observations in Central Europe

Hui Yang<sup>1</sup>, Krzysztof Stereńczak<sup>2,3</sup>, Zbigniew Karaszewski<sup>4</sup>, Nuno Carvalhais<sup>1</sup>

<sup>1</sup> Department of Biogeochemical Integration, Max Planck Institute for Biogeochemistry, 07745 Jena, Germany

5 <sup>2</sup> Instytut Badawczy Leśnictwa, ul. Braci Leśnej 3, Sękocin Stary, 05-090 Raszyn

<sup>3</sup> Forest Research Institute, Braci Leśnej 3 Street, Sękocin Stary, 05-090 Raszyn

<sup>4</sup> Department of Wood Investigation and Application, Łukasiewicz Research Network-Wood Technology Institute, Winiarska 1, 60-654 Poznań, Poland

*Correspondence to:* Hui Yang (huiyang@bgc-jena.mpg.de)

10 **Abstract.** Wood density is a crucial variable linked to mechanical, physiological, and ecological properties. In this study, we analyzed an extensive dataset of over 48,000 wood density samples collected from 2,920 trees. Our aim was to explore variations in wood density, at both inter-tree and intra-tree levels, along with the factors contributing to these variations. Inter-tree variations reveal significant differences in wood density among eight dominant species, highlighting their role in shaping wood density. As tree species exhibit specific spatial distributions associated with microhabitats, we anticipated a link between  
15 wood density distribution and microhabitat. Using a feature selection approach and random forest model, we identified six predictors, including satellite-based vegetation indexes, topographic variables, and soil sand content, capable of predicting 91% of spatial wood density variations. The Normalized Difference Vegetation Index (NDVI) positively represented the amount of carbon within trees correlated with wood density, while the Normalized Difference Water Index (NDWI), reflecting water content, and soil sand content showed negative associations. Geomorphons, which are landform elements derived from  
20 digital elevation models (DEM) and soil sand context provided insights into wood density variations. Lower wood density values were linked to landforms characterized by low geomorphons, such as summit, ridge, or shoulder. Conversely, higher wood density was found in landforms with high geomorphons, including valley, depression, or hollow areas. Furthermore, our study highlighted the importance of considering intra-tree variation, a facet often overlooked in previous research. Interestingly, the magnitude of intra-tree variation is comparable to, and in some species even exceeds, that of inter-  
25 tree variations. The intra-tree wood density samples display significant differences both vertically along the height and radially from the center to the bark zones of trees. These variations are influenced by tree growing strategy, living conditions, and physiological structure. In summary, our research delved into the multifaceted features of wood density, shedding light on critical aspects of this fundamental variable.

## 30 **1 Introduction**

Wood density, the ratio of the oven-dry mass of wood sample to its green volume, is a fundamental trait which describes the carbon apportioning within the trees. It serves as a key indicator for various ecological and physiological processes, such as tree growth, mortality rates, and the vulnerability to hydraulic failure (Chave et al. 2009). Firstly, wood density is an indispensable input for estimating above-ground biomass or carbon stocks based on the allometric equations, whether at the  
35 large-scale utilizing satellite earth observation data (e.g., ESA GlobBiomass product; Santoro et al. 2022) or at the small- or regional-scale using forest inventory data (e.g., forest resource assessment report from the Food and Agriculture Organization; FAO 2020). Therefore, assessing wood density may impact positively on the accuracy and precision of forest biomass stock assessments and associated national greenhouse gas inventories. Moreover, wood density exhibits a relationship with tree mortality rate and the carbon turnover within ecosystem (King et al. 2006; Kraft et al. 2010). For example, Chao et al. (2008)  
40 found contrasting tree mortality rates in eastern and western Amazon forests, which were related to variations in wood density, with lower density associated with higher mortality rates. In particular, recent studies indicate that wood density is associated with the resistance and resilience of forests to natural and anthropogenic disturbances such as drought and fires (Anderegg et al. 2016; Brando et al. 2012; Liang et al. 2020). This highlights the importance of understanding wood density to predict vegetation and carbon cycle dynamics under changing climate.

45 Large variability in wood density between trees has been reported. Firstly, wood density varies considerably across different tree species, genera, or families. Thurner et al. (2014) assessed the wood density measurements from Global Wood Density Database (Chave et al. 2006; Zanne et al. 2009), and found that, on average, broadleaf trees have higher wood density than needleleaf trees, but even within the same genus, significant divergence in wood density can be observed. Furthermore, the  
50 variation in wood density is closely linked to tree growth conditions, which encompass factors such as climate, nutrient availability, and soil characteristics. For example, previous regional studies have reported that wood density tends to increase with higher growth temperature (Thomas et al. 2005; Sweson and Enquist 2007) and lower elevation (Sungpalee et al. 2009), and the soil water availability, which has a negative impact on wood density in wet biomes but a positive impact in dry biomes (Rocha et al. 2020). Moreover, at the microscopic level, wood density is influenced by the characteristics of tracheid cells. For  
55 example, Gryc et al. (2011) found that in coniferous trees, thin cell walls resulting from fast growth due to lower competition for light and space are typically associated with low wood density. Conversely, thick cell walls, which result from slower growth, are related to high wood density. Additionally, the growth rate of individual trees can vary over their lifespan, leading to variations in wood density. Generally, young trees grow quickly while mature trees grow steadily (Bowman et al., 2012). Thus, the growth strategy between trees and the development stage of an individual tree's lifespan can play a role in shaping  
60 wood density gradients.

In this study, we use a novel dataset of wood density measurements collected from forests in Poland to investigate both inter-tree and intra-tree variations in wood density. The primary objectives of this study are as follows:

1. Determine the magnitude of inter-tree variations in wood density. We aim to explore how factors such as leaf type, tree family, tree species, and location contribute to the observed inter-tree variations. Additionally, we seek to understand how biotic and abiotic factors influence wood density variations among trees.
2. Examine how wood density changes with tree height (vertical density profiles), radius (radial density profiles), and different directions (northern or southern parts of discs) within individual trees. We aim to explore the underlying reasons behind these different vertical and radial density profiles within individual trees.
3. Compare the extent of inter-tree and intra-tree variations in wood density for the tree species or forest plots analyzed. We aim to determine which variation is larger and provide recommendations for estimating wood density at a large-scale.

Many previous studies have assessed the relationship between environmental conditions and wood density using data from limited the mature forest plots (Baker et al 2004; Dias et al 2018; Phillips et al 2019). The dataset used in this work is unique for Central Europe and, although it was only collected in Poland, covers age, habitat and height distributions characteristic of this part of the world. By addressing these research objectives, we aim to enhance our understanding of wood density variations both across and within trees, and provide insights into the estimation of wood density on a broader scale.

## 2 Methods

### 2.1 Study site and wood density sample collection

Our dataset includes the density of more than 48,000 samples taken from 2,920 trees, and from 391 forest plots in Poland, all carried out in the year 2018 (Figure 1). The number of trees per plot varies, averaging  $6.7 \pm 3.0$  trees. Since the sampling process involves cut down trees, only those older than 5 years were included in this study. These trees, representing a range of species, had their relevant information such as latitude, longitude, age, and species type recorded. The dataset consists of eight common tree species (belonging to three families): *Pinus sylvestris* (Pinaceae), *Picea abies* (Pinaceae), *Abies alba* (Pinaceae), *Larix decidua* (Pinaceae), *Quercus robur* (Fagaceae), *Fagus sylvatica* (Fagaceae), *Betula pendula* (Betulaceae), and *Alnus glutinosa* (Betulaceae). Moreover, specific divisions within the dataset exist for certain species. For example, the plots of *Pinus sylvestris* and *Quercus robur* are categorized into two groups based on soil fertility, denoted as "low fertile soils" and "fertile soils" respectively. Similarly, the plots of *Picea abies* and *Fagus sylvatica* were classified into two groups according to the elevation of the plots, labeled as "lowlands" and "highlands and mountains" respectively. Low plots are typically located in lowlands, ranging from 0 to 300 m asl. In this study, field plots were selected from elevations not exceeding 100 m asl. In contrast, high plots begin at 300 m asl, encompassing both uplands and mountainous areas. In Polish conditions, these high

plots extend up to 1600 m asl. These distinctions within the species-specific plots allow for a more detailed exploration of the impacts of environmental conditions on wood density.

95 Based on the leaf type and leaf habit, the eight species in our analysis belong to three plant function types (PFTs) categories: evergreen needleleaf forest (ENF), deciduous needleleaf forest (DNF) and deciduous broadleaf forest (DBF). One family, Pinaceae, has both evergreen needleleaf and deciduous needleleaf species. Taking into account both the families and PFTs, the eight species can be further divided into four types, i.e. Pinaceae\_ENF, Pinaceae\_DNF, Fagaceae\_DBF and Betulaceae\_DBF. The trees population were divided arbitrarily into nine age classes: The age of trees are 0-20 years, 20-40  
 100 years, 40-60 years, ..., 140-160 and 160-180 years, respectively. Note that the age of the tree is determined by counting the rings on wood discs obtained from the bottom of a trunk. Furthermore, the trees were classified into seven height classes and six diameter-at-breast-height (DBH) classes: The heights classes were divided into following seven categories: <10 meters, 10-15 meters, 15-20 meters, 20-25 meters, 25-30 meters, 30-35 meters and >35 meters. The DBH of trees were divided into six categories: <100 centimeters, 100-200 centimeters, 200-300 centimeters, 300-400 centimeters, 400-500 centimeters, and  
 105 >500 centimeters.

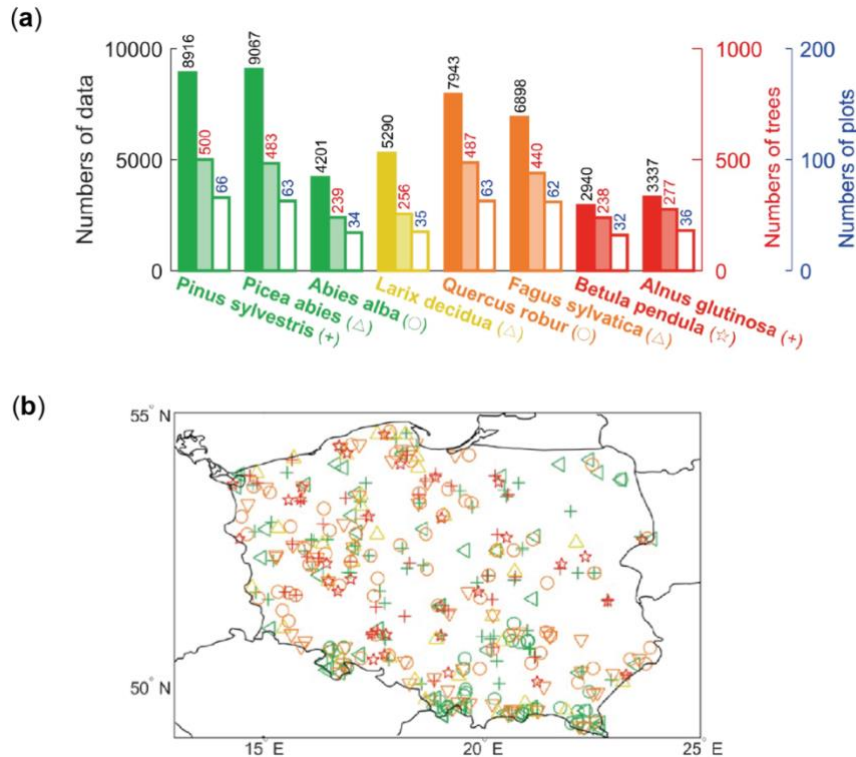

**Figure 1: (a) The number of samples (solid-colored bars), trees (light-colored bars), and forest plots (transparent bars) utilized for density measurements across the eight species. (b) Location of 391 forest plots in Poland (symbols as in panel a).**

For the analysis of the intra-tree variation in wood density, a total of 1,886 trees were included, and for each tree, more than  
110 30 wood samples were collected from tree cores obtained from discs using a sharp increment borer. These trees were  
specifically selected as they were dead but had not undergone wood drying. Each tree was divided into three equal parts, and  
a disc was obtained from the middle of each part. The three discs were labeled as "bottom," "middle," and "top" based on their  
respective positions within the tree. Each disc was cut from north to south to obtain a strip of wood. The samples were divided  
and numbered into two rays: north and south, starting from the core to the peripheral part. This method allowed for the  
115 estimation of variation in the radial density of wood. The number of samples obtained for each disc varied depending on the  
width of the disc, but each disc typically yielded more than 10 samples along these radial directions. Standardized wood density  
samples, measuring 2×2×3 cm, were cut from the strips, which were dried in a dryer at temperature of  $103 \pm 2$  °C to an  
absolutely dry state. After the samples cooled down in the desiccator, the linear dimensions of the samples were measured  
using an electronic caliper, and their weight was measured on a laboratory scale. The stereometric density was then calculated  
120 from the classical mass/volume formula. During measurement, each density sample was examined for wood defects such as  
compression and tension wood, knots, resin wood, cracks, abnormal shapes after drying, and other irregularities. In this study,  
only defect-free samples were selected for further analysis, adhering to the standards for small sample density measurement.

## 2.2 Study site and wood density sample collection

125 To assess the inter-tree variations, we computed the mean wood density for each tree. Subsequently, we employed analysis of  
variance (ANOVA) to partition the overall variations in tree-level wood density ( $n = 2,920$ ) across different levels including  
leaf habit, leaf type, family, species, and age classes. The total variance is calculated as:

$$\sum_{i=1}^t \sum_{j=1}^{n_i} (X_{ij} - \bar{X})^2, \quad (1)$$

where  $X_{ij}$  is the  $j$ th wood density from class  $i$ , and there are  $n_i$  wood density samples in class  $i$ , and  $\bar{X}$  is the average of all the  
130 wood density samples. And variance explained by leaf habit/leaf type/family/species/age is calculated as:

$$\sum_{i=1}^t n_i (\bar{X}_i - \bar{X})^2, \quad (2)$$

where  $\bar{X}_i$  is the average of wood density of class  $i$ .

To assess the intra-tree variations, we examined the differences in wood density among the bottom, middle and top parts of  
trees. In addition to ANOVA analysis, we conducted multiple comparison tests to evaluate the significance of wood density  
135 differences between any two of the bottom, middle, and top discs.

To account for the influence of location, we aggregated tree-level wood density measurements based on geographical  
proximity. Specifically, we considered two criteria: (1) trees located within a short distance of each other, and (2) trees falling  
within the same fine-resolution grid cell. Using the first criterion, trees were considered to be at the same location if the distance  
140 between them was less than 100 meters (or 500 meters). This resulted in the distribution of 2,920 trees across 382 unique

locations (or 372 unique locations). Using the second criterion, a pre-defined grid mesh with resolutions of 0.05° (or 0.1°) was utilized. Trees falling within the same grid cell were considered to be at the same location. To analyze the impact of location, we applied the same ANOVA methodology used previously to partition the total variations in tree-level wood density into different locations.

145

Tree-level wood density was calculated by the average of all samples within each individual trees. This method is used because there was no significant difference between the mean and median values of the samples (Figure S1a), indicating that wood density within an individual tree typically follows a normal distribution. Furthermore, the magnitude of intra-tree variability is consistent across eight tree species (Figure S1b). To investigate the key climatic, edaphic or vegetation-related factors influencing the spatial distribution of tree-level wood density, we extracted the relevant predicted variables from high-resolution satellite products and observation-based climate products, based on the latitude and longitude of samples, and employed a feature selection method (Jung and Zscheischler 2013) to identify the most significant predictors. Based on this selection, six important covariates were chosen, including vegetation indexes, vegetation water content, soil texture, and topographic characteristics (refer to Table 1). These selected covariates were then used to train a random forest model in the cross-validation analysis. The random forest model, based on decision tree ensembles, has been shown to have a better performance than the neural networks for handling tabular data (Grinsztajn *et al.*, 2022). The R package ‘randomForest’ was used in this analysis to build a random forest model with 500 trees. The tree-level wood density, calculated as the average value of all wood density samples within each tree, was randomly partitioned into training and testing subsets, with 80% of the measurements allocated to the training set and the remaining 20% reserved for testing. To evaluate the performance of the model, we assessed its efficiency using the Out-of-bag (OOB)  $R^2$  metric, which yielded a value of 0.91. Additionally, in order to gain insights into how these selected covariates influence wood density within the random forest model, we computed the SHAP (Shapley Additive exPlanations) values for each covariate. These values represent the difference between the model's prediction and the null model (Lundberg and Lee, 2017). By examining the SHAP values, we can gain a better understanding of the individual contributions of each covariate to the prediction of wood density.

165

**Table 1. The predictor covariates used in the random forest model for inter-tree variations in wood density. The original 8-daily values of NDVI and NDWI were aggregated into a median (P50) and a standard deviation (STD) for the entire period.**

| Variables   | Description                                                                                                          | Unit | Original resolution | Source                       |
|-------------|----------------------------------------------------------------------------------------------------------------------|------|---------------------|------------------------------|
| SNDPPT      | Weight percentage of the sand particles (0.05–2 mm)                                                                  | %    | 250 m               | SoilGrids database           |
| NDWI        | 8-daily Enhanced Vegetation Index (EVI) generated using the gridded daily surface reflectance product.               | 1    | 0.083°              | MOD13A2                      |
| NDVI        | 8-daily Normalized Difference Vegetation Index (NDVI) generated using the gridded daily surface reflectance product. | 1    |                     |                              |
| Geomorphons | a pattern recognition approach to classification and mapping of landforms from digital elevation models (DEMs)       | -    | 30m                 | Jasiewicz & Stepinski (2013) |

### 3 Results

#### 170 3.1 Inter-tree variation in wood density

Figure 2a shows the distribution of tree-level wood density for eight tree species, which were classified into three families, and three PFTs (also see Table S1). Overall, the variation in wood density among species is greater than the variation within each species. Consistent with the findings in Thurner et al. (2014), our results indicate that the mean wood density of evergreen needleleaf forests, that is *Pinus sylvestris*, *Picea abies*, *Abies alba* species, is lower than the density of deciduous needleleaf forests (*Larix decidua* species), and the mean wood density of needleleaf forests is lower than that of broadleaf forests, including *Quercus robur*, *Fagus sylvatica*, *Betula pendula*, and *Alnus glutinosa* species. When considering tree families, the mean wood density of Pinaceae is slightly lower than that of Betulaceae (Pinaceae:  $0.44 \pm 0.06$  < Betulaceae:  $0.53 \pm 0.06$ ;  $p$ -value < 0.001 according to the left-tailed  $t$ -test), and significantly lower than that of Fagaceae (Fagaceae:  $0.67 \pm 0.04$ ;  $p$ -value = 0 according to the left-tailed  $t$ -test). These findings align with the general patterns observed in previous research, highlighting the differences in wood density among tree species and families.

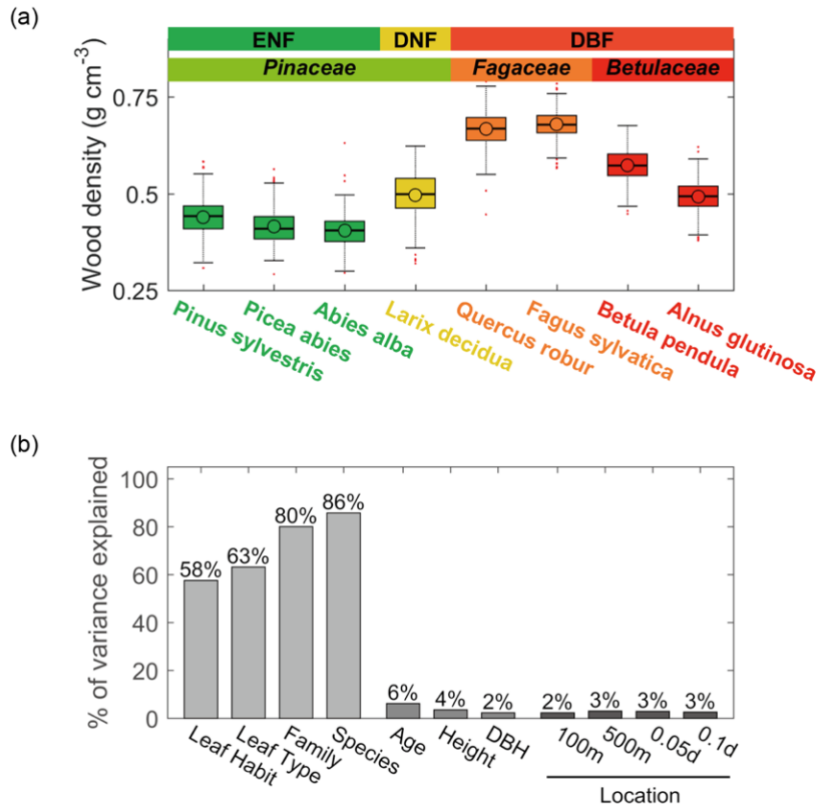

185 **Figure 2: (a) Boxplots of tree-level wood density. On each box, the central bar indicates the median and the dot indicates the mean of wood density; the bottom and top edges indicate the 25th and 75th percentiles; the whiskers extend to all data points except outliers (which are plotted individually as small red dots). Eight tree species belong to three families (Pinaceae, Fagaceae and Betulaceae), and were classified into two categories according to their leaf habit or types: evergreen (E) or deciduous (D) trees, needleleaf (N) or broadleaf (B) trees. Family, leaf habit and leaf type are labelled on the top of boxplot. (b) The fraction of variance of tree-level wood density explained by the leaf habit (two levels), leaf type (two levels), families (three levels), species (eight levels), age (nine levels), height (seven levels), DBH (six levels) and locations. The trees with geographic distance less than 100 or 500 m, or in the same fine-resolution grid cell (i.e., 0.05, 0.1 degree) are considered as in the same location.**

190

A quantitative analysis indicates that species, families, leaf types, and leaf habits explain a massive portion of the variance in tree-level wood density, accounting for 85%, 80%, 63% and 58% respectively (Figure 2b). In contrast, tree location is not a discriminating factor, and it only explains less than 3% of the variance in tree-level wood density, regardless of the method related to distances or grid sizes used to identify trees within the same location (see Methods, section 2.2 Analysis of inter-tree variation in wood density). The reason is that the geographical location does not differentiate the tree species in Poland, as different tree species with varying wood density are distributed across similar locations in Poland, as shown in Figure 1b. This variance in wood density, unexplained by location, could be related to local environmental conditions such as vegetation characteristics, soil properties and topography. While our approach of linking tree-averaged wood density with tree species,

195



families, leaf types, and ages is validated by the strong explanatory power of the generalized linear mixed-effects model (Table S2), we recognize that this method inherently averages out significant intra-tree variability. This variability, which cannot be fully accounted for by these factors alone, is an important aspect of wood density dynamics that warrants further investigation. Therefore, our findings should be interpreted with the understanding that the tree-level averages, while useful, may not capture the full complexity of wood density variations within individual trees.

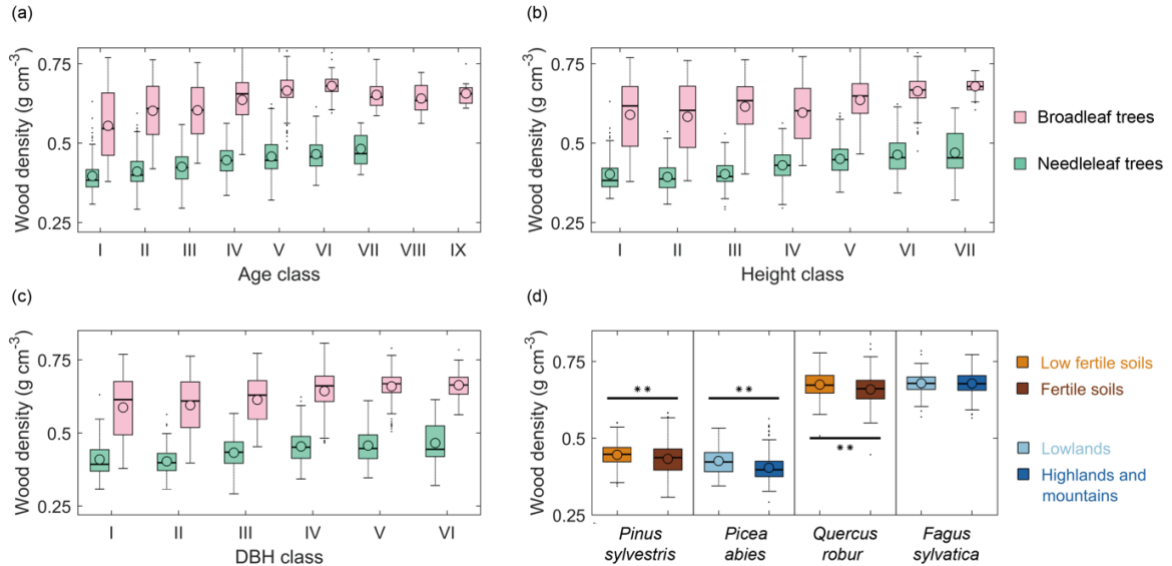

205 **Figure 3: (a) Boxplots of tree-level wood density for needleleaf and broadleaf trees at nine different age classes. The higher classes, the older ages. (b) Boxplots of tree-level wood density for needleleaf and broadleaf trees with different height classes. The height of tree increases with the number of height class. (c) Boxplots of tree-level wood density for needleleaf and broadleaf trees with different DBH classes. The DBH of tree increases with the number of DBH class. (d) comparison of tree-level wood density for one specific species but growing in the low fertile or fertile soils, or growing at lowlands or highlands (mountains). Two asterisk indicates the significant difference in the mean of two samples (via t-test, 0.001 significance level).**  
 210

The contributions of tree age, height, and breast height diameter (DBH) to the variance in wood density among trees are relatively low, accounting for 6%, 4%, and 2% respectively (Figure 2b). Note that height, DBH and age are interrelated and not independent variables, and their collinearity may result in an overestimation of the contribution of each individual factor.  
 215 When analyzing needleleaf and broadleaf trees separately, their effects become more apparent (Figure 3a-c). First, regarding the impacts of tree ages (Figure 3a), for broadleaf trees, wood density tends to increase with tree age up to approximately 140 years (class VII), after which it stabilizes. For needleleaf trees, wood density also exhibits an increase in wood density with age up to 140 years (class VII). Since there are no observation of wood density from older needleleaf trees, it remains unclear whether wood density would continue increase or stabilized beyond 140 years. Second, both needleleaf and broadleaf trees  
 220 show an increase in mean wood density with height and DBH classes, especially for tall broadleaf trees (height class  $\geq 4$ , i.e., tree height  $\geq 20$ m). However, the variance in wood density within these height and DBH classes are large, resulting in no

statistically significant difference in wood density distributions among classes (Figure 3b-c). In addition, the influence of soil fertility on wood density is noteworthy and consistently observed in two tree species, *Pinus sylvestris* and *Quercus robur*. Trees growing in low-fertility soils exhibit significantly higher wood density compared to those in fertile soils (*t*-test, *p*-val < 0.001; Figure 3d). Unlike soil fertility effects, the effects of elevation or slope on wood density are only evident in needleleaf trees of the *Picea abies* species. Specifically, the wood density of trees in lowland areas is significantly higher than that in highlands or mountains (*t*-test, *p*-val < 0.001). However, for *Fagus sylvatica* species, there is no significant difference in wood density between lowland and highland regions (Figure 3d).

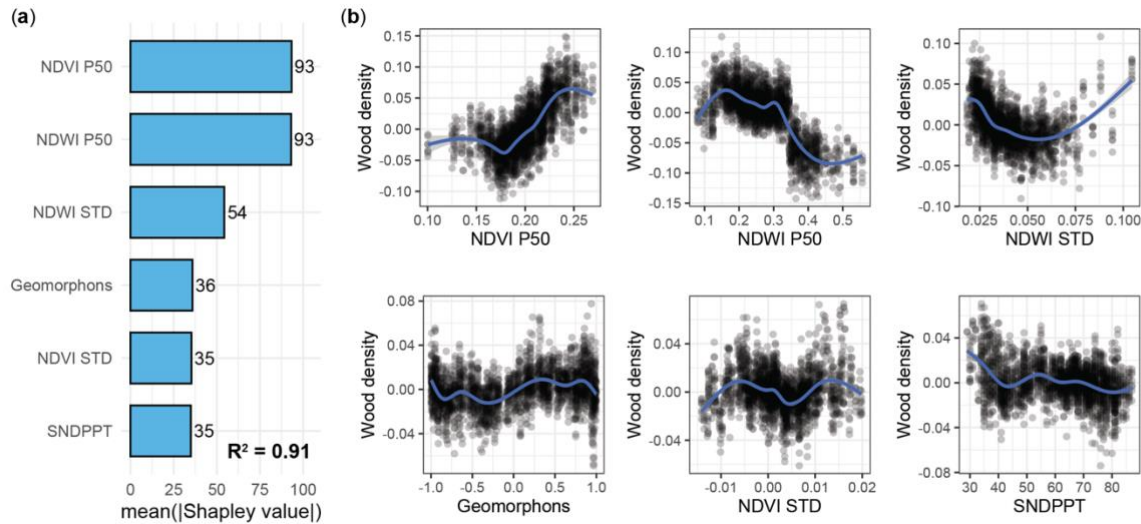

230 **Figure 4: The factors influencing inter-tree variation in wood density using a random forest (RF) model. (a) Barplot of the mean absolute SHAP values of factors. (b) SHAP dependence plots of the median value (P50) and standard deviation (STD) of the Normalized Difference Vegetation Index (NDVI) and the Normalized Difference Water Index (NDWI), tomographic index of Geomorphons, and soil sand content (SNDPPT). The y-axis is the retrieved SHAP values of wood density, measured in g cm<sup>-3</sup>.**

235 Furthermore, we employed a random forest model to predict the observed inter-tree wood density variability and to investigate the importance of influencing factors, including vegetation, soil and topographic properties. Altogether, these factors can explain 91% of the spatial variations in wood density across trees (Figure 4a) and can distinguish the variability in wood density determined by tree species (Figure S2). Among the predictors, vegetation greenness and water content indexes (e.g., NDVI and NDWI) are the most influential factors, followed by topographic geomorphons metric and soil sand content. To

240 further investigate the individual effects of these factors on wood density variation, SHAP dependence plots were generated for the six most influential factors in the random forest model. As shown in Figure 4b, higher NDVI values (indicating greater carbon content within trees; Huete et al., 1999) and lower NDWI values (indicating higher water content within trees; Gao, 1996) are associated with higher wood density. Geomorphons provide insights into the types of landforms associated with wood density variations. Low geomorphons representing summit, ridge or shoulder correspond to low wood density.

245 Conversely, high wood density is associated with high geomorphons representing valley, depression, hollow area. Lastly, a negative relationship is observed between wood density and high soil sand content, which reflects lower soil fertility and moisture levels. It is important to note that this finding contradicts the results obtained for *Pinus sylvestris* and *Quercus robur* in Figure 3d, suggesting species-specific responses to soil fertility.

### 3.2 Intra-tree variation in wood density

#### 250 *Vertical variations within the trees*

To examine the differences in wood density among the bottom, middle and top parts of trees, we conducted an ANOVA analysis. The results indicate that about 35% of all the trees exhibit significant vertical variations ( $p$ -value < 0.05) in wood density (Figure 5a). The percentage of trees with significant vertical variations ( $p$ -value < 0.05) varied among species, with *Alnus glutinosa* and *Pinus sylvestris* species having the highest percentage (around 50%), while *Betula pendula* species had  
255 the lowest percentage of 8%. Subsequently, we compared the overall distribution of wood density among the three tree parts for those trees with significant vertical variation (see boxplots in Figure 5b). When considering all the samples regardless of species, there were no significant differences in mean wood density among the bottom, middle, and top parts of the trees, and no clear vertical profiles in wood density could be observed. However, when analyzing individual species, mean wood density from bottom, middle, and top parts were found to have differences, based on multiple comparison tests. Among the seven  
260 species, two types of vertical profiles were identified. The first type exhibited a decrease in wood density with increasing tree height, with the highest wood density observed in the bottom part. This pattern was observed in species such as *Pinus sylvestris*, *Abies alba*, and *Betula pendula*. In contrast, the second type showed an increase in wood density with tree height, with the highest wood density observed in the top part. This pattern was observed in *Picea abies*, *Larix decidua*, *Quercus robur*, and *Alnus glutinosa* species. Most trees exhibited consistent vertical variation profiles in wood density, except for *Fagus sylvatica*,  
265 where both "Top is the highest" and "Bottom is the highest" profiles were observed (Figure 5b).

#### *Radial variations within the trees*

Unlike the vertical variation, as shown in Figure 6, the radial profiles of wood density for different species exhibit a certain similarity. Across species, wood density tends to decrease from the outer to inner zones, indicating that wood density near the  
270 bark is generally higher than that in the center of discs. The magnitude of radial variations in wood density is typically larger at the bottom disc (represented by brown curves) compared to the middle and top discs (represented by orange and green curves). This greater variation at the bottom discs could be associated with the presence of older and earliest growing parts, which are only located in the bottom sections of the trees. There are exceptions observed in *Quercus robur* and *Fagus sylvatica* species. *Quercus robur* species exhibits an opposite radial profile, with higher wood density in the center than near the bark  
275 (Figure 6f). Additionally, *Fagus sylvatica* species is the only species that does not show significant radial variation in wood density (Figure 6e). Furthermore, we conducted a comparison of radial variations between the northern and southern parts of

the discs. Using a two-sample t-test, we found that wood density samples from the northern and southern parts generally do not exhibit significant differences (Figure 7).

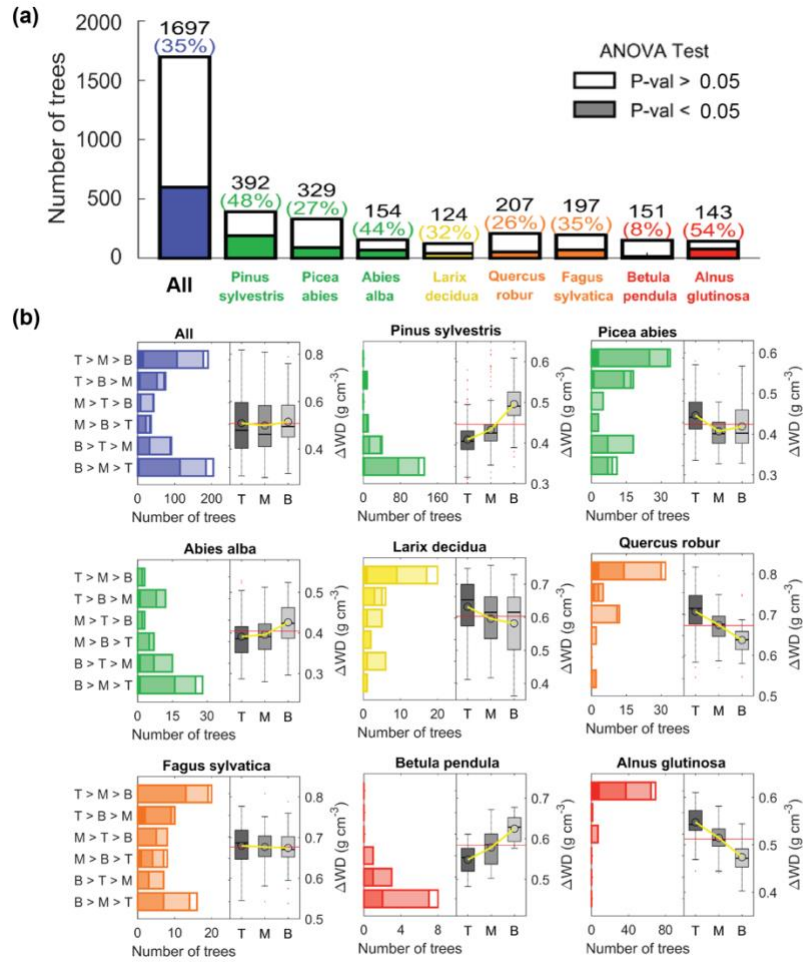

280 **Figure 5: Comparison of wood density of the discs from the top (T), middle (M) and bottom (B) part of tree. (a) Fractions (The**  
**number) of trees with significant differences (P-val < 0.05) in wood density among three levels (top, middle, and bottom) discs via**  
**ANOVA analysis. (b) The relation among the top, middle and bottom discs, in comparison to the mean values of wood density, via**  
**the multiple comparison test. The color depth in the left-hand panels presents the pairs of two discs with significant difference. The**  
**darkest colors indicate that any two of three discs have significant difference (P-val < 0.05), while the lightest colors indicate that**  
**285 none of two discs have significant difference. The right-hand panels show the boxplots of wood density of top, middle, bottom discs**  
**of trees, respectively. The yellow curves indicate the changes in the averaged wood density among top, middle and bottom discs. And**  
**the red lines present the averages of all wood density records.**

290

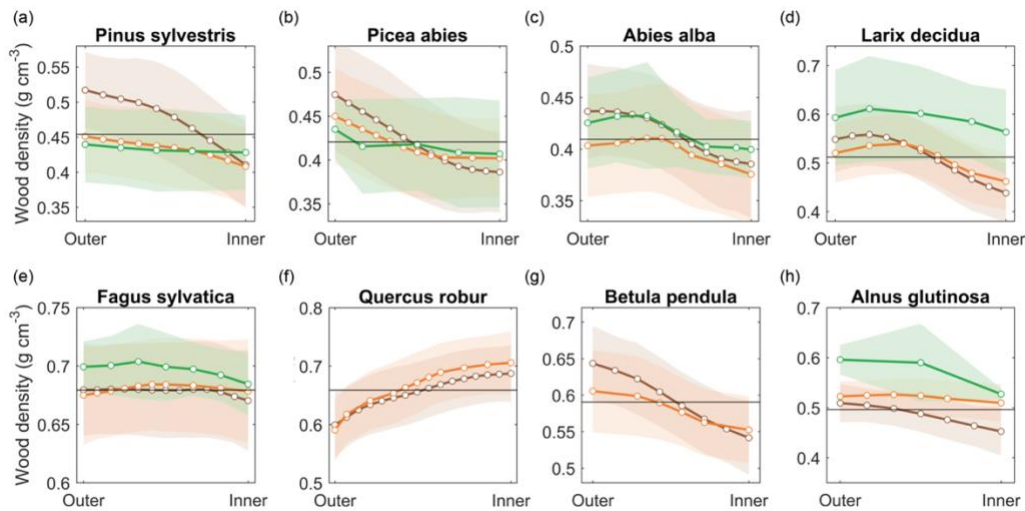

**Figure 6:** Radial variations in wood density of top (green), middle (orange) and bottom (brown) discs for eight species. Black line indicates mean wood density. The x-axis indicates relative radial position within the discs (left: pith, right: bark). The colored curves present the mean of wood density, and colored shadings show the one standard deviation of wood density.

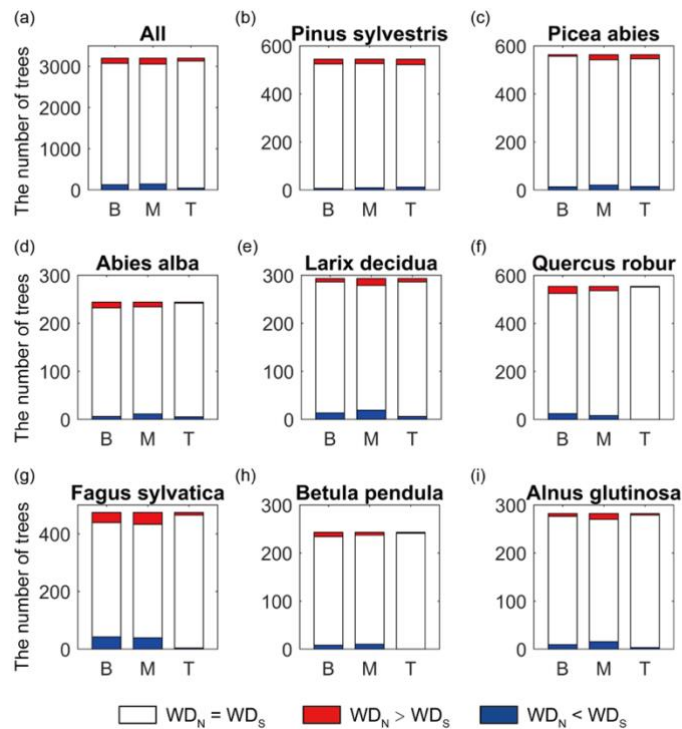

**Figure 7:** Comparison in wood density between the northern (WDN) and southern (WDS) part of discs for top, middle and bottom discs respectively. Bar plots show the number of trees, which have non-significant difference between WDN and WDS (white), WDN significantly larger than WDS (red), or WDN significantly smaller than WDS (blue), using t-test at 0.05 significance level. (a) all trees, and (b)-(i) eight tree species separately.

## 300 **4 Discussions**

### *Factors influencing the inter-tree variations*

Large-scale variations in wood density have been reported to correlate to climatic variability (Wiemann et al. 2002; Thomas et al. 2007). However, in this study, tree-level variations in wood density are more closely related to vegetation indexes rather than climatic variables. This is likely due to the limited variability of climate variables in the forests of Poland, where all the wood density measurements were taken. As a result, wood density variations depend more on vegetation properties, such as tree species, leaf type, and leaf habit. Interestingly, the effects of tree species in explaining spatial variability in wood density can be substituted by vegetation water and carbon content. Therefore, the utilization of satellite-based NDVI and NDWI can effectively predict a substantial portion of the variations in wood density. In accordance with previous research, our findings align with the notion that species characterized by tall height require wider vessels to facilitate hydraulic conductivity and sap transport to leaves, resulting in higher vegetation water content (Coomes et al. 2008), but lower wood density. Conversely, the relationship between wood density and leaf traits property exhibits great complexity. Earlier studies have reported a negative association between wood density and leaf size, as well as photosynthetic capacity (Santigo et al. 2004; Wright et al. 2007), owing to the growth strategies of species with larger leaves, which exhibit faster volumetric growth (Wright et al. 2004). However, our findings reveal an opposite relationship between satellite-based vegetation index (NDVI, which usually indicate canopy greenness and cover) and wood density when controlling for factors such as vegetation water content, landform types, and soil texture. Specifically, trees with high NDVI (indicating large canopy coverage) exhibit high wood density.

Besides climate, we identified the significance of topography in explaining wood density, consistent with findings from other regional analyses. However, it is important to note that the influence of topography on wood density can vary across different regions. For example, Sungpalee et al. (2009) found that tree-level wood density in a Thai tropical forest is lower at higher elevations and on eastern slopes, while Kraft et al. (2008) reported that high tree-level wood density in a Costa Rican montane forest was found on ridges. These discrepancies can be attributed to the fact that topography may be associated with variations in soil fertility or light availability. Specifically, valleys tend to have less fertile soils. In addition, trees on ridges may receive more sunlight compared to those in valleys. The limiting factors for vegetation growth can differ across regions, leading to diverse relationships between wood density and topography, as well as soil fertility. Our results demonstrate contrasting effects of soil fertility on wood density across different tree species. Further studies are required to elucidate the underlying causal processes that contribute to the observed association between wood density and topography, particularly in relationship with factors such as soil fertility and light availability.

### 330 *Factors influencing the intra-tree variations*

Two distinct vertical profiles of wood density may be associated with different tree growth conditions and strategies. The first profile is characterized by higher wood density in the bottom part of the tree compared to the top part. Trees exhibiting this

profile often inhabit challenging and harsh environmental conditions, such as areas prone to extreme weather events like heavy storms, rains, and snowfall. These trees tend to adopt a conservative growth strategy, prioritizing investments in wood structure (i.e., the bottom part of the tree) over rapid growth (Wright et al., 2004). In contrast, the second vertical profile shows higher wood density in the top part of the tree compared to the bottom part. Trees with this profile tend to adopt a fast-growing, productive strategy, allocating more carbon to the upper regions of the tree to outcompete neighboring trees for essential resources such as light, water, and nutrients. The mean height of different tree species further supports this hypothesis. For instance, alder trees and spruce trees (*Alnus glutinosa* and *Pinus sylvestris* species), exhibiting the first vertical profile, are relatively short, reaching maturity at heights of about 12 to 18 meters, while fir, larch, oak, and alder trees (*Picea abies*, *Larix decidua*, *Quercus robur*, and *Alnus glutinosa* species) with the second vertical profile are larger, attaining heights of 30 to 50 meters.

The radial profile of wood density commonly exhibits an increase from the center of the tree towards the bark. This pattern is likely attributed to the fact that the carbon uptake capacity of trees tends to increase with tree age and size, resulting in higher wood density in the newly formed growth rings (Thomas and Malczewski 2007). However, *Quercus robur* species deviates from this general radial profile due to its specific cellular structure. The species is characterized by a significant presence of large vessels and fibers in the outer zones, closer to the bark, leading to a lower wood density, especially for hardwood species (Barnett and Jeronimidis, 2003; Pallardy, 2008).

350

#### *Comparison the magnitude of inter- and intra-tree variation in wood density*

We conducted a comparison between inter- and intra-tree variations in wood density, focusing on the magnitude of these variations. To quantify the magnitude, we used the normalized standard deviation, also known as the coefficient of variation. The comparison was conducted at both the species level (Figure 8a) and the plot level (Figure 8b). Across all eight species analyzed, the results consistently demonstrate that the variations within individual trees exhibit larger magnitudes compared to the inter-tree variations. This can be observed in Figure 8, where the data points consistently lie above the 1:1 line. Specifically, the within-tree variations are approximately 1.2 times greater than the inter-tree variations. This finding emphasizes the significance of understanding the variations in wood density within individual trees. It also suggests that relying on a single sample to represent the wood density of a tree may lead to substantial uncertainty. Also, it is important to note that our findings are based on wood density measurements conducted in Poland. To generalize and validate the comparison between inter- and intra-tree variations in wood density on a larger scale, further investigations are needed.

360

## **5 Conclusion**

Our study, conducted in Poland and focusing on wood density measurements, investigates the variations in wood density both among and within trees. Our results suggest that significant differences in wood density measurements among different tree species. Through the implementation of a random forest model, we demonstrated that the combined use of satellite-based

365

vegetation indexes (such as NDVI and NDWI), topographic variables, and soil sand content can effectively predict 91% of the inter-tree variations in wood density. Furthermore, within individual trees, we observed variations in wood density across different tree heights and along the radial direction from the inner to the outer zones of the discs. These vertical and radial profiles of wood density within trees may be attributed to climatic conditions, growth strategies, and the physiological structure of the trees. Notably, we found that the magnitude of wood density measurements within trees is substantial, even surpassing the magnitude of inter-tree variations in wood density. This emphasizes the significance of considering the intra-tree variations when analyzing wood density.

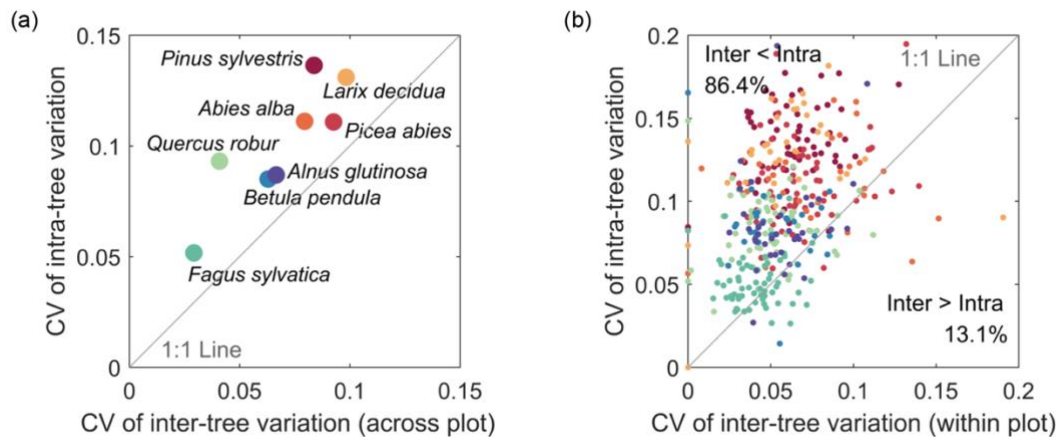

375 **Figure 8. (a) Comparison of the magnitude of inter-tree variations in wood density across plots (within a species) and intra-tree variations. Both inter- and intra-tree variations were quantified using standard deviation of wood density, and were normalized by the mean values. (b) Comparison of the magnitude of inter-tree variations in wood density within a plot and intra-tree variations. The color of dots presents the species of trees within the plot, same as panel (a).**

### Acknowledgements

380 The data used for analysis were collected under REMBIOFOR project entitled “Remote sensing-based assessment of woody biomass and carbon storage in forests”, which was financially supported by the National Centre for Research and Development (Poland), under the BIOSTRATEG programme (Agreement No. BIOSTRATEG1/267755/4/NCBR/2015). H. Y. is supported by the Project Office BIOMASS (grant number 50EE1904) funded by the German Federal Ministry for Economic Affairs and Climate Action.

385

### Data Availability Statement

All published data sources have been referenced in the manuscript. All the data supporting the findings of this study will be publicly available after acceptance.



## References

- 390 Anderegg, W.R., Klein, T., Bartlett, M., Sack, L., Pellegrini, A.F., Choat, B., Jansen, S., 2016. Meta-analysis reveals that hydraulic traits explain cross-species patterns of drought-induced tree mortality across the globe. *Proc Natl Acad Sci U.S.A.* 113, 5024-5029.
- Baker, T. R., Phillips, O. L., Malhi, Y., Almeida, S., Arroyo, L., Di Fiore, A., ... & Vasquez Martinez, R. 2004. Variation in wood density determines spatial patterns in Amazonian forest biomass. *Global Change Biol* 10(5), 545-562.
- 395 Barnett, J. R., & Jeronimidis, G. (Eds.). 2003. *Wood Quality and its Biological Basis*. CRC Press.
- Brando, P.M., Nepstad, D.C., Balch, J.K., Bolker, B., Christman, M.C., Coe, M., Putz, F.E., 2012. Fire-induced tree mortality in a neotropical forest: the roles of bark traits, tree size, wood density and fire behavior. *Global Change Biol* 18, 630-641.
- Chao, K.J., Phillips, O.L., Gloor, E., Monteagudo, A., Torres-Lezama, A., Martínez, R.V., 2008. Growth and wood density  
400 predict tree mortality in Amazon forests. *J Ecol* 96, 281-292.
- Chave, J., Andalo, C., Brown, S., Cairns, M.A., Chambers, J.Q., Eamus, D., ... , Yamakura, T., 2005. Tree allometry and improved estimation of carbon stocks and balance in tropical forests. *Oecologia* 145, 87-99.
- Chave, J., Muller-Landau, H.C., Baker, T.R., Easdale, T.A., Steege, H.T., Webb, C.O., 2006. Regional and phylogenetic variation of wood density across 2456 neotropical tree species. *Ecol Appl* 16, 2356-2367.
- 405 Chave, J., Coomes, D., Jansen, S., Lewis, S.L., Swenson, N.G., Zanne, A.E., 2009. Towards a worldwide wood economics spectrum. *Ecol Lett* 12, 351-366.
- Dias, A., Gaspar, M. J., Carvalho, A., Pires, J., Lima-Brito, J., Silva, M. E., & Louzada, J. L. 2018. Within-and between-tree variation of wood density components in *Pinus nigra* at six sites in Portugal. *Ann For Sci* 75, 1-19.
- Gao, B. C. 1996. NDWI—A normalized difference water index for remote sensing of vegetation liquid water from space.  
410 *Remote Sens Environ* 58(3), 257-266.
- Grinsztajn, L., Oyallon, E., & Varoquaux, G. 2022. Why do tree-based models still outperform deep learning on typical tabular data?. *Adv Neural Inf Process Syst* 35, 507-520.
- Gryc, V., Vavrčík, H., & Horn, K., 2011. Density of juvenile and mature wood of selected coniferous species. *J For Sci* 57(3), 123-130.
- 415 Huete, A., Justice, C., & Van Leeuwen, W. 1999. MODIS vegetation index (MOD13). Algorithm theoretical basis document, 3(213), 295-309.
- Jasiewicz, J., & Stepinski, T. F. 2013. Geomorphons—a pattern recognition approach to classification and mapping of landforms. *Geomorphology*, 182, 147-156.
- Jung, M., Zscheischler, J., 2013. A guided hybrid genetic algorithm for feature selection with expensive cost functions.  
420 *Procedia Comput Sci* 18, 2337-2346.
- King, D.A., Davies, S.J., Supardi, M.N., Tan, S., 2005. Tree growth is related to light interception and wood density in two mixed dipterocarp forests of Malaysia. *Funct. Ecol.* 19, 445-453.
- Kraft, N.J., Metz, M.R., Condit, R.S., Chave, J., 2010. The relationship between wood density and mortality in a global tropical forest data set. *New Phytol* 188, 1124-1136.

- 425 Liang, X., Ye, Q., Liu, H., Brodribb, T.J., 2021. Wood density predicts mortality threshold for diverse trees. *New Phytol* 229, 3053-3057.
- Lundberg, S.M., Lee, S.I., 2017. A unified approach to interpreting model predictions. *Advances in neural information processing systems*, 30.
- Pallardy, S. G. 2008. *Physiology of Woody Plants*. Academic press.
- 430 Phillips, O. L., Sullivan, M. J., Baker, T. R., Monteagudo Mendoza, A., Vargas, P. N., & Vásquez, R. 2019. Species matter: wood density influences tropical forest biomass at multiple scales. *Surv Geophys* 40, 913-935.
- Rocha, S.M.G., Vidaurre, G.B., Pezzopane, J.E.M., Almeida, M.N.F., Carneiro, R.L., Campoe, O.C., ... & Figura, M.A., 2020. Influence of climatic variations on production, biomass and density of wood in eucalyptus clones of different species. *For Ecol Manage* 473, 118290.
- 435 Santoro, M., Cartus, O., Mermoz, S., Bouvet, A., Le Toan, T., Carvalhais, N., ... , Seifert, F.M., 2018. A detailed portrait of the forest aboveground biomass pool for the year 2010 obtained from multiple remote sensing observations. In EGU general assembly conference abstracts: 18932.
- Swenson, N.G., Enquist, B.J., 2007. Ecological and evolutionary determinants of a key plant functional trait: wood density and its community-wide variation across latitude and elevation. *Am J Bot* 94, 451-459.
- 440 Sungpalee, W., Itoh, A., Kanzaki, M., Sri-ngernyuang, K., Noguchi, H., Mizuno, T., Sorn-ngai, A., 2009. Intra-and interspecific variation in wood density and fine-scale spatial distribution of stand-level wood density in a northern Thai tropical montane forest. *J Trop Ecology*, 25, 359-370.
- Thomas, D.S., Montagu, K.D., Conroy, J.P., 2007. Temperature effects on wood anatomy, wood density, photosynthesis and biomass partitioning of *Eucalyptus grandis* seedlings. *Tree Physiol* 27, 251-260.
- 445 Thurner, M., Beer, C., Santoro, M., Carvalhais, N., Wutzler, T., Schepaschenko, D., ..., Schmullius, C., 2014. Carbon stock and density of northern boreal and temperate forests. *Global Ecol Biogeogr* 23, 297-310.
- Wiemann, M.C., Williamson, G.B., 2002. Geographic variation in wood specific gravity: effects of latitude, temperature, and precipitation. *Wood Fiber Sci* 34, 96-107.
- Woodcock, D., Shier, A., 2002. Wood specific gravity and its radial variations: the many ways to make a tree. *Trees*, 16, 437-443.
- 450 Zanne, A.E., Westoby, M., Falster, D.S., Ackerly, D.D., Loarie, S.R., Arnold, S.E., Coomes, D.A., (2010). Angiosperm wood structure: global patterns in vessel anatomy and their relation to wood density and potential conductivity. *Am J Bot* 97, 207-215.
